# Supplementary material for: Evaluation of the safety and immunomodulatory effects of sargramostim in a randomized, double-blind phase 1 clinical Parkinson’s disease trial
Source: PubMed Central journal article supplement (PMC5445595; doi:10.1038/s41531-017-0013-5), 2017-03-23
Supplement: 41531_2017_13_MOESM2_ESM.pdf [file 41531_2017_13_MOESM2_ESM.pdf]

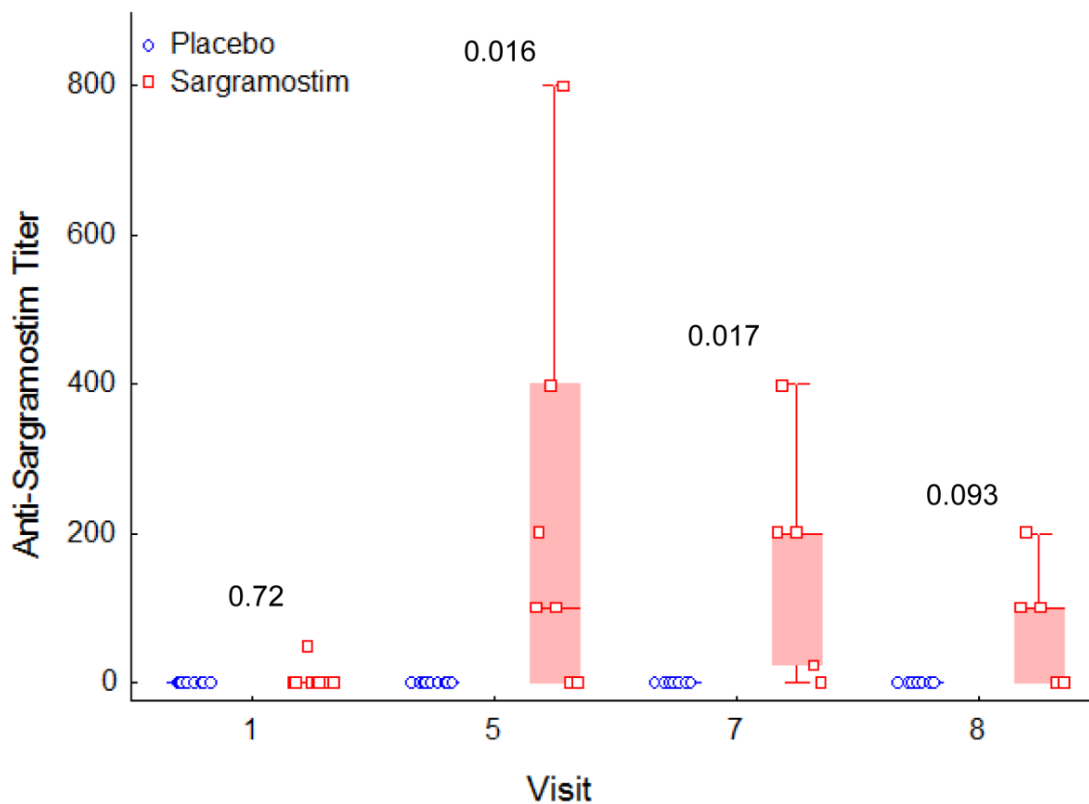

**Figure S2. Anti-sargramostim antibodies in sera of treated PD patients.**

Serum samples from PD patients treated with placebo (blue open circles) or sargramostim (red open boxes) were obtained at weeks -8, 4, 8, and 12 relative to initiation of treatment (visits 1, 5, 7, and 8). Samples were initially screened by sargramostim-specific ELISA. Positive samples were confirmed by immunoprecipitation assay; ELISA endpoint titers defined as the reciprocal of the last dilution above the titration; and antibody neutralization using a CSF2R-expressing cell-based assay system with a luciferase reporter detecting functional sargramostim. Medians (line), IQRs (box), and non-outlier ranges (whiskers) were determined for ELISA titers of anti-sargramostim antibodies for PD patients treated with placebo ( $n_{v1} = 8$ ,  $n_{v5} = 9$ ,  $n_{v7} = 7$ , and  $n_{v8} = 8$ ) or sargramostim ( $n_{v1} = 8$ ,  $n_{v5} = 7$ ,  $n_{v7} = 5$ , and  $n_{v8} = 5$ ). Pairwise comparisons of anti-sargramostim titer medians between placebo- and sargramostim-treated patients for each visit were determined by Mann-Whitney U test and p values provided for each visit.
