# Supplementary material for: Evaluation of the safety and immunomodulatory effects of sargramostim in a randomized, double-blind phase 1 clinical Parkinson’s disease trial
Source: PubMed Central journal article supplement (PMC5445595; doi:10.1038/s41531-017-0013-5), 2017-03-23
Supplement: 41531_2017_13_MOESM3_ESM.pdf [file 41531_2017_13_MOESM3_ESM.pdf]

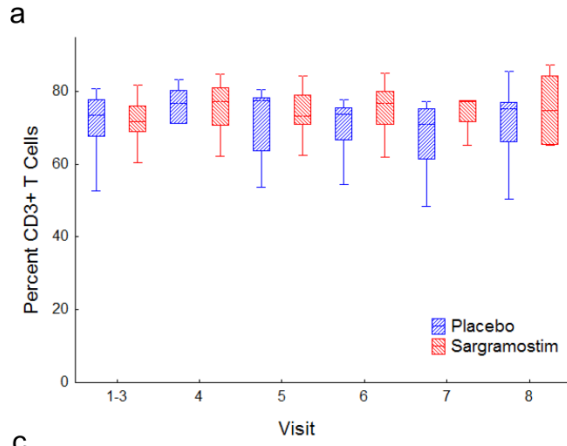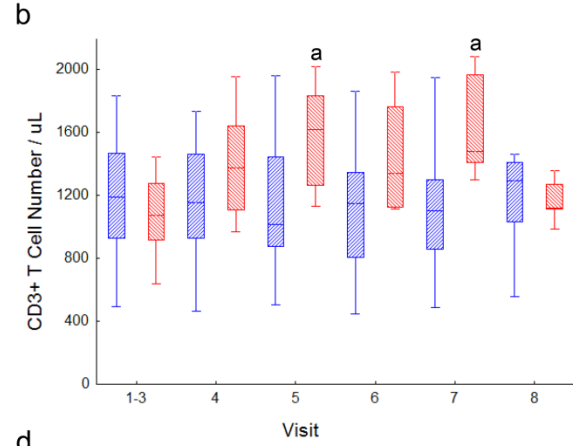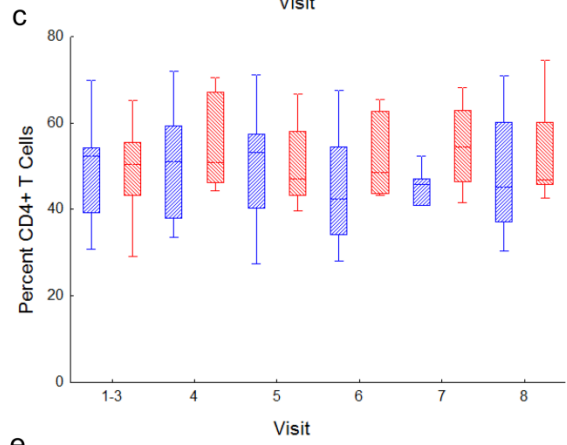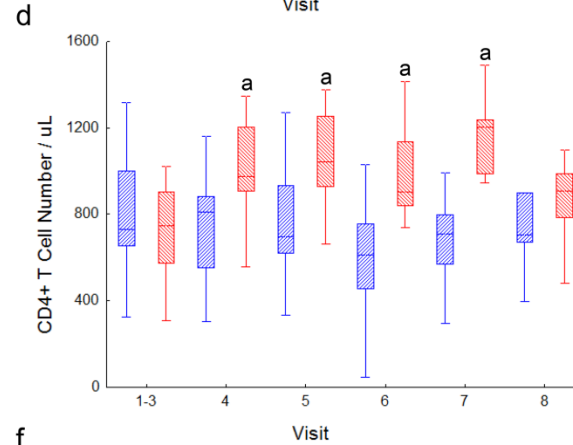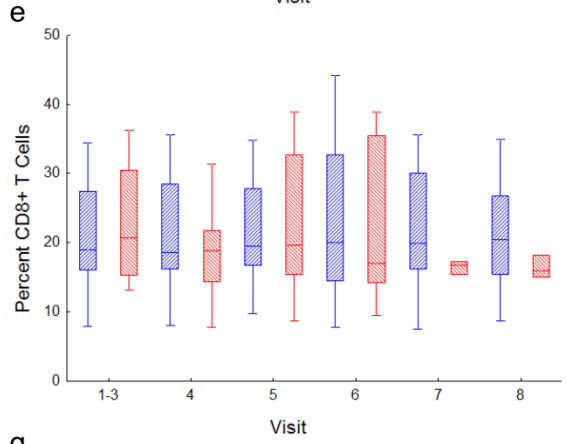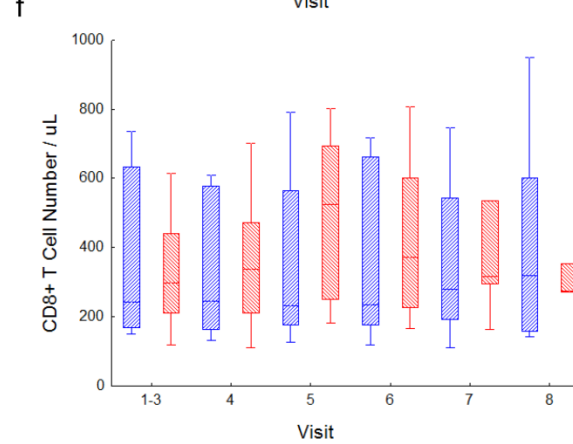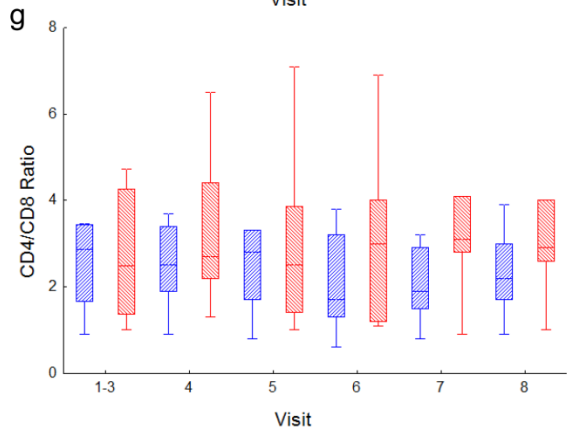

**Figure S3. Flow cytometric analyses of T cells from PD patients.**

Peripheral blood lymphocytes from whole blood of PD patients were assessed by flow cytometric analysis for frequency, number, and ratio of T cells (T cell panel) by the UNMC Regional Pathology Services. T cell panels were determined for PD patients over a 3-month mean baseline (visits 1-3), every 2 weeks after the initiation of treatment (visits 4-7), and 4 weeks after discontinuation of treatment (visit 8). Flow cytometric analyses for (a) percentages and (b) numbers per  $\mu\text{L}$  of  $\text{CD3}^+$  T cells; (c) percentages and (d) numbers per  $\mu\text{L}$  of  $\text{CD4}^+$  T cells; (e) percentages and (f) numbers per  $\mu\text{L}$  of  $\text{CD8}^+$  T cells; and (g) ratios of percentages of  $\text{CD4}^+/\text{CD8}^+$  T cells. Plots represent the medians, interquartile ranges (IQRs) (boxes), and non-outlier ranges (whiskers) for T cells from PD patients. Levels of T cell subsets from PD patients treated with placebo ( $n = 6-10$ ) (blue) or sargramostim ( $n = 5-9$ ) (red) were compared by Mann-Whitney U test with  $P \leq .05$ .
